# Supplementary material
Source: MDPI journal article supplement (https://www.mdpi.com/2076-3417/8/2/147)
Supplement: s1 [file s1]

Archive with 2 entries (2 files):
- supplmatv2_match_paperv9rev1v1BW.pdf
- VideoS1 in situ 5um-per-sec BSA MBS line pattern.avi
