# Supplementary material
Source: MDPI journal article supplement (https://www.mdpi.com/2076-3417/8/2/147)
Supplement: s1 [file s1 › supplmatv2_match_paperv9rev1v1BW.pdf]

Femtosecond Laser Direct Write Integration of Multi-Protein Pattern and 3D  
Microcomponents into 3D Glass Microfluidic Devices  
Supplementary Material

## Contents

|                                                            |   |
|------------------------------------------------------------|---|
| 1. Laser Properties.....                                   | 1 |
| 2. Fluence and Total Accumulated Fluence Calculation ..... | 2 |
| 3. Two-Photon Polymerization Fitting Process .....         | 3 |
| 4. Absorption Spectra and Penetration Depth .....          | 5 |

## 1. Laser Properties

**Table S 1.** Laser properties of both femtosecond lasers used in this study.

|                                                                                     | FCPA $\mu$ Jewel D-400<br>(IMRA America) | Mikan<br>(Amplitude Systemes) |
|-------------------------------------------------------------------------------------|------------------------------------------|-------------------------------|
| documented                                                                          |                                          |                               |
| frequency [kHz]                                                                     | 200                                      | 54,000                        |
| pulse duration [fs]                                                                 | 360                                      | 400                           |
| duty cycle                                                                          | 7.34E-08                                 | 0.0000216                     |
| center wavelength                                                                   | 1045 nm                                  | 1000-1100 nm                  |
| Center wavelength of second harmonic generated by BBO* <sup>1</sup>                 | 522 nm                                   | 525 nm                        |
| Polarization                                                                        | Linear                                   | Linear                        |
| Beam profile                                                                        | Gaussian                                 | Gaussian                      |
| 20x CF Plan (Nikon) N.A.=0.46,<br>W.D.=3.1, EPI, lens transmission for 525 nm light | 0.935                                    | 0.935                         |
| measured                                                                            |                                          |                               |
| average power loss from static power meter to before the lens                       | 0.85                                     | 0.7241                        |
| spot area [cm <sup>2</sup> ]                                                        | 2.636E-08                                | 2.112E-08                     |
| spot diameter [cm]                                                                  | 1.832E-04                                | 1.744E-04                     |
| spot radius [cm]                                                                    | 9.160E-05                                | 8.719E-05                     |
| Fabrication ranges (for details see Table S2)                                       |                                          |                               |
| Laser power range, corrected for losses of beam path and lens [mW]                  | 0.0935-6.4                               | 3.385-6.093                   |
| Scanning velocity [ $\mu$ m/s]                                                      | 0.2-10                                   | 0.05-0.5                      |

\*1 BBO = beta barium borate crystal

Femtosecond Laser Direct Write Integration of Multi-Protein Pattern and 3D  
Microcomponents into 3D Glass Microfluidic Devices  
Supplementary Material

**Table S 2.** All used fabrication parameter pairs of laser power and scanning velocity. Laser powers are corrected for loss during beam path and by objective lens transmission.

| FCPA µJewel D-400<br>(IMRA America) |                             | Mikan<br>(Amplitude Systemes) |                             |
|-------------------------------------|-----------------------------|-------------------------------|-----------------------------|
| Laser power [mW]                    | Scanning velocity<br>[µm/s] | Laser power [mW]              | Scanning velocity<br>[µm/s] |
| 6.400                               | 2                           | 6.093                         | 0.5                         |
| 6.400                               | 0.2                         | 6.093                         | 0.2                         |
| 3.974                               | 5                           | 6.093                         | 0.1                         |
| 2.805                               | 5                           | 5.958                         | 0.2                         |
| 1.987                               | 5                           | 5.958                         | 0.1                         |
| 1.870                               | 5                           | 5.958                         | 0.05                        |
| 0.993                               | 5                           | 5.416                         | 0.5                         |
| 0.795                               | 10                          | 5.416                         | 0.2                         |
| 0.795                               | 5                           | 5.416                         | 0.1                         |
| 0.374                               | 1                           | 4.739                         | 0.2                         |
| 0.094                               | 5                           | 4.739                         | 0.1                         |
| 0.187                               | 5                           | 3.385                         | 0.1                         |

## 2. Fluence and Total Accumulated Fluence Calculation

Fluence  $\Phi$  [J/cm<sup>2</sup>] is calculated by considering the following equations.

$$\Phi = \frac{E_{pulse}}{A_{focal\ spot}}, \quad (1)$$

$$P_{peak} = \frac{E_{pulse}}{\tau}, \quad (2)$$

$$P_{peak} = \frac{P_{Ave}}{D}, \quad (3)$$

$$D = \frac{\tau}{T} = f\tau, \quad (4)$$

$$\Phi = \frac{P_{Ave}}{f A_{focal\ spot}}, \quad (5)$$

where  $E_{pulse}$  is laser pulse energy [J],  $A_{focal\ spot}$  is the effective focal spot area [cm<sup>2</sup>],  $\tau$  is pulse duration [s],  $f$  is pulse frequency [Hz],  $D$  is duty cycle of a pulse,  $T$  is the pulse period [s], and  $P_{peak}$  and  $P_{Ave}$  are the peak power [W] and average power [W] of the laser pulse, respectively.

Total accumulated fluence (TAF,  $\Phi_{NET}$  [J/cm<sup>2</sup>]) or net fluence is calculated by applying an effective number of pulses,  $N_{eff}$ . The effective number of pulses considers the geometrical overlap between individual pulses while scanning a line. It could also consider geometrical overlap between different lines, but we keep lines purposefully separate and therefore only need to consider the focal spot overlap by Gaussian focal spot radius  $\omega_0$  [cm] and pulse frequency  $f$  versus scanning velocity  $v$  [cm/s]:

Femtosecond Laser Direct Write Integration of Multi-Protein Pattern and 3D  
Microcomponents into 3D Glass Microfluidic Devices  
Supplementary Material

$$N_{eff} = \sqrt{\frac{\pi}{2}} \frac{\omega_0 f}{v}, \quad (6)$$

$$\Phi_{NET} = N_{eff} \Phi, \quad (7)$$

where the factor  $\sqrt{\pi/2}$  is a result of integration over the so-called Gaussian integral. This result was mentioned by another work about effective pulse numbers of Gaussian polymerization [S1]. In our experiments, we change laser power and scanning velocity, while pulse frequency is constant. For comparing measurements with two or three quantities changed, we consider total accumulated fluence most reasonable.

### 3. Two-Photon Polymerization Fitting Process

Line width has been reported previously in dependence of laser power and processing time  $t_p$  [S2]. Laser power is introduced via photon flux  $N_{flux,0}$  and power intensity  $I_0$ , where the 0 indicates the center of the Gaussian beam. Both quantities are related to fluence. Processing time is correlated with  $N_{eff}$ . In the following, we will search for an equation in dependence of fluence and scanning velocity instead of previously introduced dependence of laser power and processing time.

$$w(N_{flux,0}, t) = a_R \omega_0 \sqrt{\ln\left(\frac{\eta \sigma_2 N_{flux,0}^2 f \tau t_p}{C}\right)}, \quad (8)$$

$$t_p = \frac{t_{irradiation}}{f \tau}, \quad (9)$$

$$t_{irradiation} = N_{eff} \tau, \quad (10)$$

$$N_{flux,0} = \frac{I_0}{h \nu_r}, \quad (11)$$

$$I_0 = \frac{\Phi D}{\tau}, \quad (12)$$

where  $a_R$  is a scaling factor,  $\sigma_2$  is the absorption cross section of the photoinitiator for two-photon absorption,  $\eta$  is the efficiency of radical initiation,  $t_p$  is the processing time including dark phases of laser pulses,  $t_{irradiation}$  is the irradiation time of accumulated laser pulses,  $h$  is the Planck constant,  $\nu_r$  is the resonance frequency of light,  $w$  is diameter of the polymerized volume element that we measure as the line width, and  $C$  is the logarithm of the ratio of initial and threshold concentration.

Femtosecond Laser Direct Write Integration of Multi-Protein Pattern and 3D  
Microcomponents into 3D Glass Microfluidic Devices  
Supplementary Material

Summarizing the constants into one variable, where possible, we find:

$$w(\Phi\Phi_{NET}) = a\sqrt{\ln(b\Phi\Phi_{NET})}, \quad (13)$$

As in the previous reporting, feature size is proportional to a complex expression reflecting the two-photon aspect as quadratic influence, note  $\Phi\Phi_{NET} \propto \Phi^2 \frac{1}{v}$ . For practical reasons, it is our goal to show all data as  $d(\Phi\Phi_{NET})$ , but  $a$  and  $b$  are obtained by fitting  $d(\Phi\Phi_{NET})$ .

For fitting, we utilize excel logarithmic function fitting. However, to match the complexity of Eqn. 13 we actually fit the square in order to abolish the square-root:

$$\begin{aligned} w^2(\Phi\Phi_{NET}) &= a^2 \ln(b\Phi\Phi_{NET}) = a^2 \ln(\Phi\Phi_{NET}) + a^2 \ln b \\ d^2(\Phi\Phi_{NET}) &= A \ln(\Phi\Phi_{NET}) + B \\ \text{With } a &= \sqrt{A} \text{ and } b = e^{B/A} \end{aligned} \quad (14)$$

reg. Fig.2

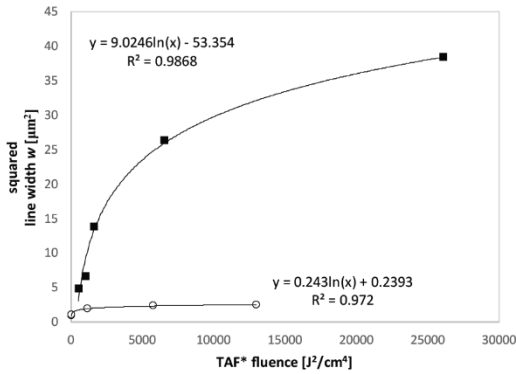

reg. Fig.4

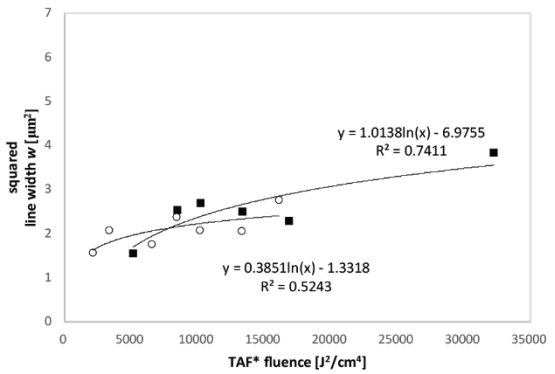

**Figure S 1.** Actual fitting results obtained as described. Square symbols are data for in-channel fabrication, Circles symbolize data for on-surface fabrication. Note that despite laser changes, fabrication range is overlapping.

#### 4. Absorption Spectra and Penetration Depth

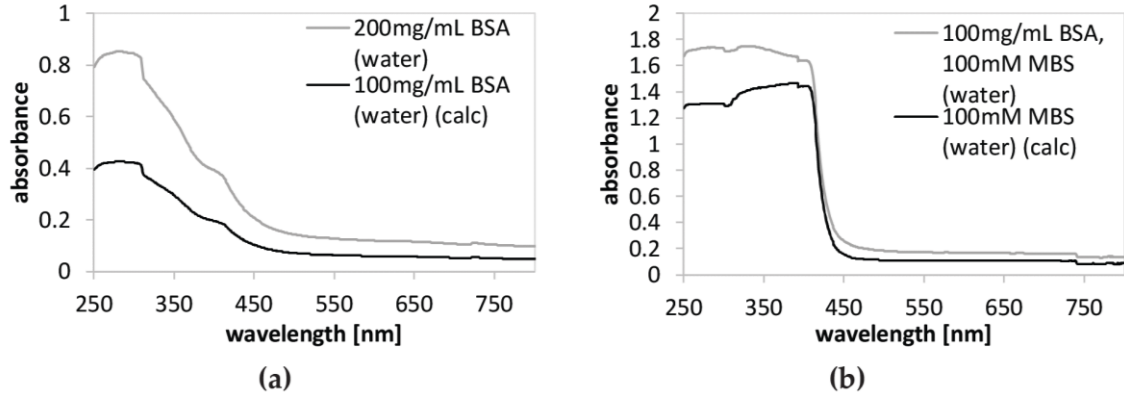

**Figure S 2.** Absorption spectra of (a) BSA in water and (b) BSA with MBS in water. Assuming linearity between absorbance and concentration, we scale 200 mg/mL BSA to 100 mg/mL BSA in water. These values are subtracted from 100 mg/mL BSA, 100 mM MBS measurement to calculate 100 mM MBS in water. These spectra were measured by a UV-3600 Plus UV-VIS-NIR spectrophotometer (Shimadzu).

$$A_{\lambda,d} = \log_{10} \frac{I_0}{I}, \quad (14)$$

$$A_{\lambda,d} = \varepsilon_{\lambda} d c \quad (15)$$

$$\varepsilon_{\lambda} = A_{\lambda,1cm} / (1cm \cdot c) \quad (16)$$

$$d_{\lambda,I=I_0/10} = \frac{1}{\varepsilon_{\lambda} c} \quad (17)$$

$$d_{\lambda,I=I_0/10} = \frac{1 \text{ cm}}{A_{\lambda,1cm}} \quad (18)$$

**Table S 3.** Estimate of penetration depths.

|             | $A_{\lambda=525nm}$ from Fig.S2 | Estimate molar<br>absorption coefficient<br>$\varepsilon_{\lambda=525nm} [\text{cm}^{-1}\text{mM}^{-1}]$ | Penetration depth $d$ ,<br>where $I = I_0/10$<br>[cm] |
|-------------|---------------------------------|----------------------------------------------------------------------------------------------------------|-------------------------------------------------------|
| BSA, 1.5 mM | 0.0665                          | 0.0443                                                                                                   | 15.03                                                 |
| MBS, 100 mM | 0.1095                          | 0.001095                                                                                                 | 9.13                                                  |

#### References

- [S1] Tan, B., Venkatakrishnan, K., Makaronets, A. Effects of pulsewidth on two-photon polymerization. *Des. Monomers Polym.* **2013**, 16, 145-150, doi:10.1080/15685551.2012.705502
- [S2] Serbin, J., Egbert, A., Ostendorf, A., Chichkov, B. N., Houbertz, R., Domann, G., Schulz, J., Cronauer, C., Fröhlich, L., Popall March, M. Femtosecond laser-induced two-photon polymerization of inorganic-organic hybrid materials for applications in photonics. *Opt. Lett.* **2003**, 28, 301–303, 10.1364/OL.28.000301.
